# Supplementary material
Source: ML conference proceedings conference paper supplement (https://www.ecva.net/papers/eccv_2020/papers_ECCV/html/123550426_ECCV_2020_paper.php)

(a)

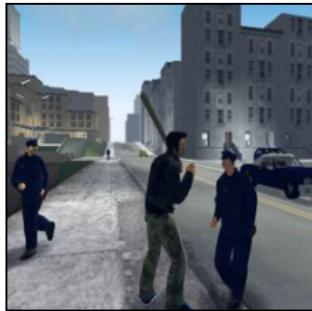

Category : Baseball

Prediction: Ladder

Baseline: 0.56

Proposed: 0.48

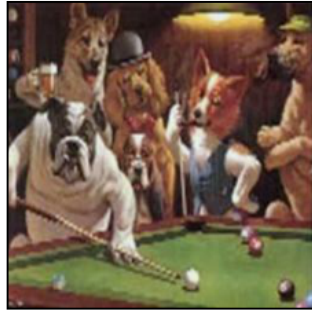

Category: Billiards

Prediction: Kangaroo

Baseline: 0.41

Proposed: 0.59

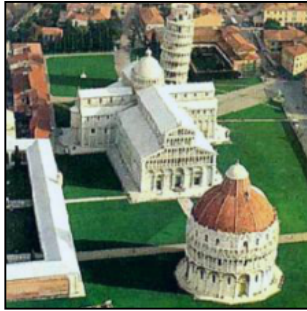

Category: Pisa-Tower

Prediction: Pisa-Tower

Baseline: 0.73

Proposed: 0.57

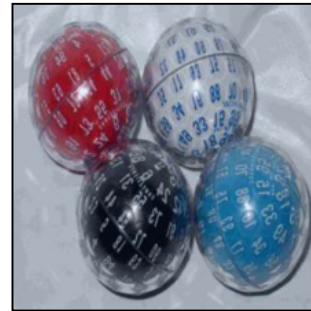

Category: Dice

Prediction: Golfball

Baseline: 0.35

Proposed: 0.29

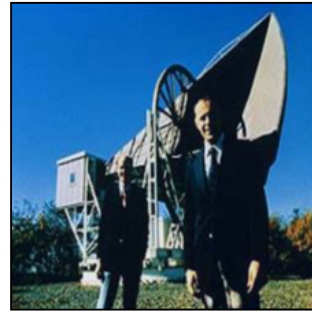

Category: Telescope

Prediction: Telescope

Baseline: 0.55

Proposed: 0.63

(b)

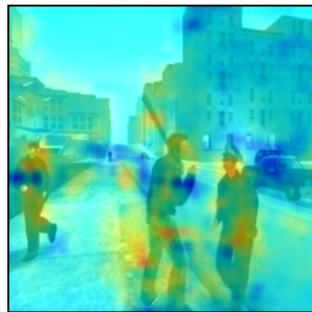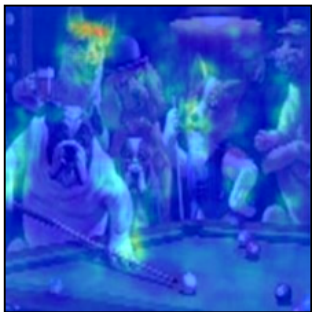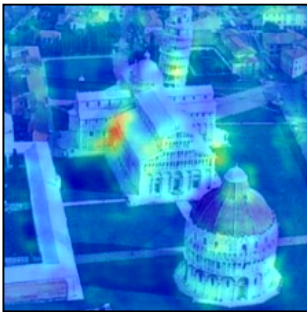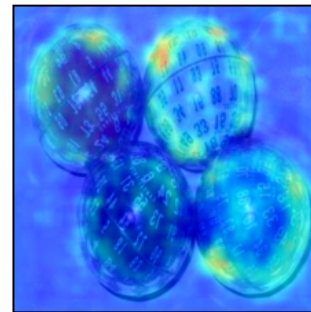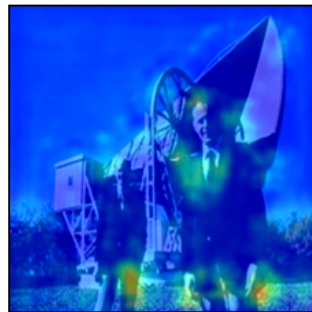

Supplement: Supplementary file 1 [file 123550426-supp.zip]
