# Supplementary material
Source: ML conference proceedings conference paper supplement (https://www.ecva.net/papers/eccv_2020/papers_ECCV/html/123550426_ECCV_2020_paper.php)
Supplement: Supplementary file 2 [file 123550426-supp.zip]

# In-class

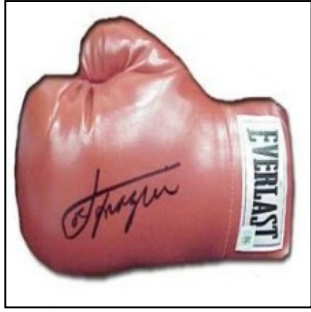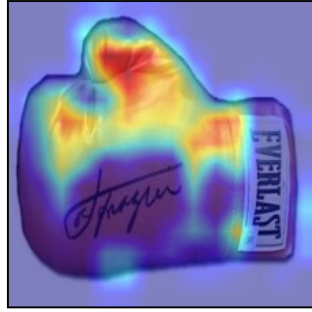

Ground Truth: Boxing-Glove Rank-1 Class: **Boxing-Glove**  
Score: 0.99

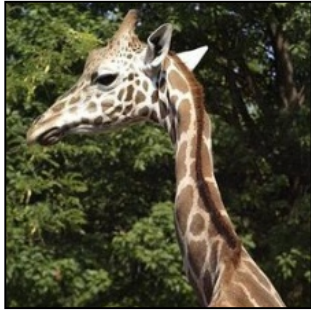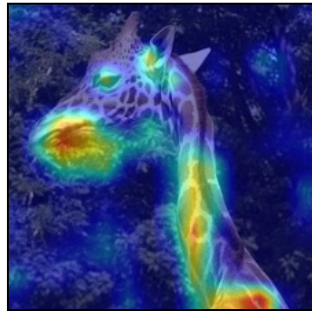

Ground Truth: Giraffe Rank-1 Class: **Giraffe**  
Score: 0.94

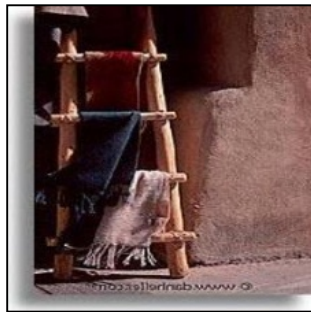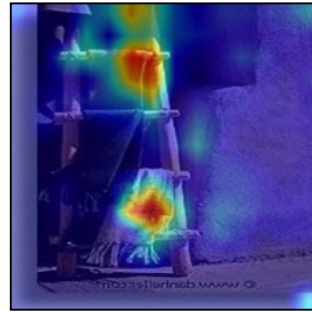

Ground Truth: Ladder Rank-1 Class: **Ladder**  
Score: 0.96

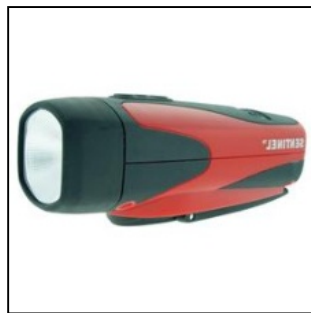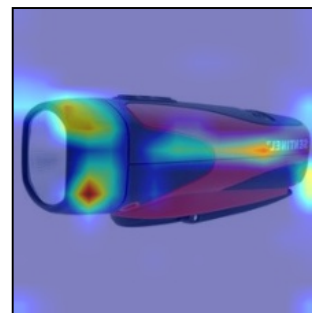

Ground Truth: Flashlight Rank-1 Class: **Flashlight**  
Score: 0.89

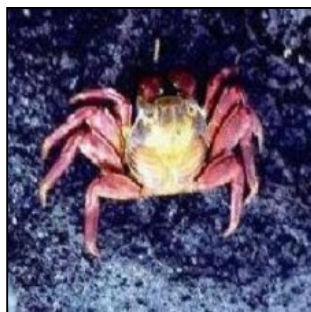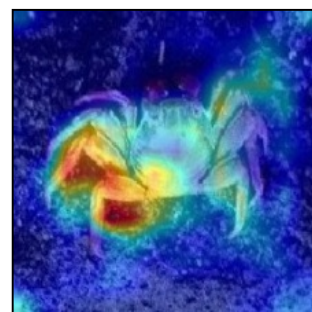

Ground Truth: Crab Rank-1 Class: **Crab**  
Score: 0.99

# Novel Class

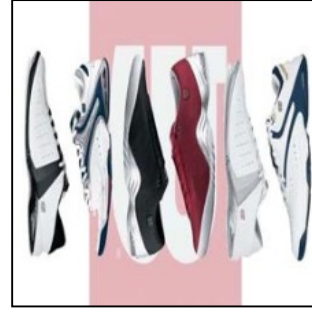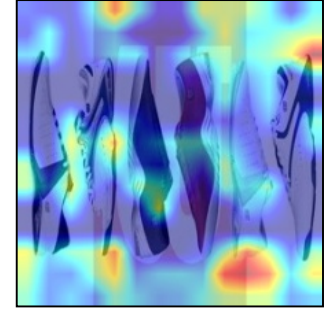

Ground Truth: Shoes Rank-1 Class: **Boxing-Glove**  
Score: 0.92

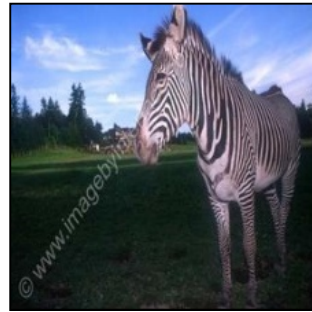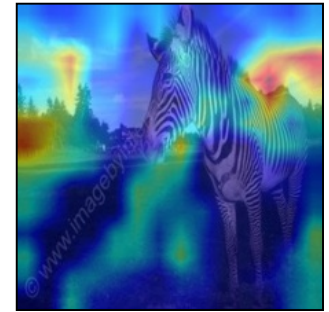

Ground Truth: Zebra Rank-1 Class: **Giraffe**  
Score: 0.85

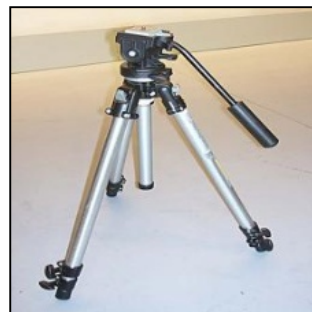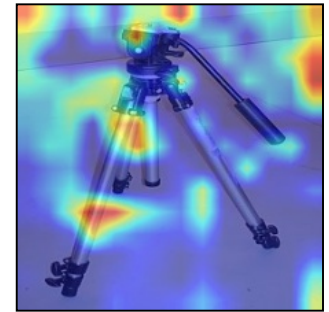

Ground Truth: Tripod Rank-1 Class: **Ladder**  
Score: 0.99

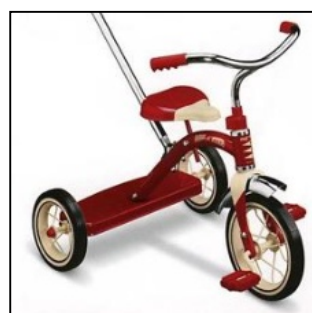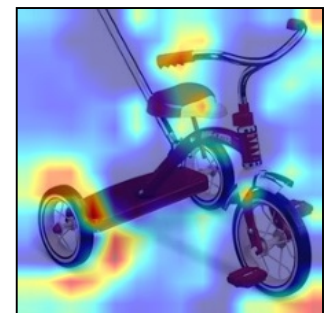

Ground Truth: Tricycle Rank-1 Class: **Flashlight**  
Score: 0.95

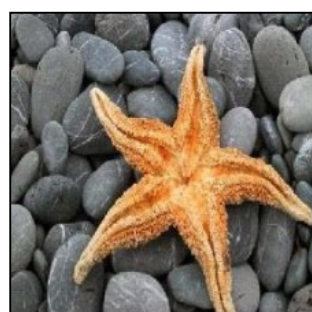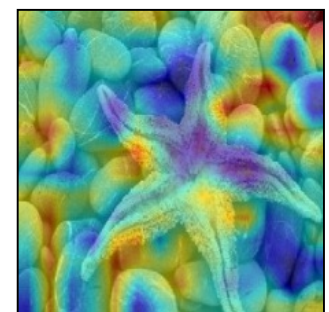

Ground Truth: Starfish Rank-1 Class: **Crab**  
Score: 0.88
